# Supplementary material
Source: publisher figshare collection journal article supplement (https://tandf.figshare.com/ndownloader/files/27640171)
Supplement: Supplementary file 1 [file 27640171]

## **Supplemental Information**

Comparison of Methods of Functional Group Analysis Using Results from Laboratory and Field Aerosol Measurements

Megan S. Claflin, Jun Liu, Lynn M. Russell, and Paul J. Ziemann

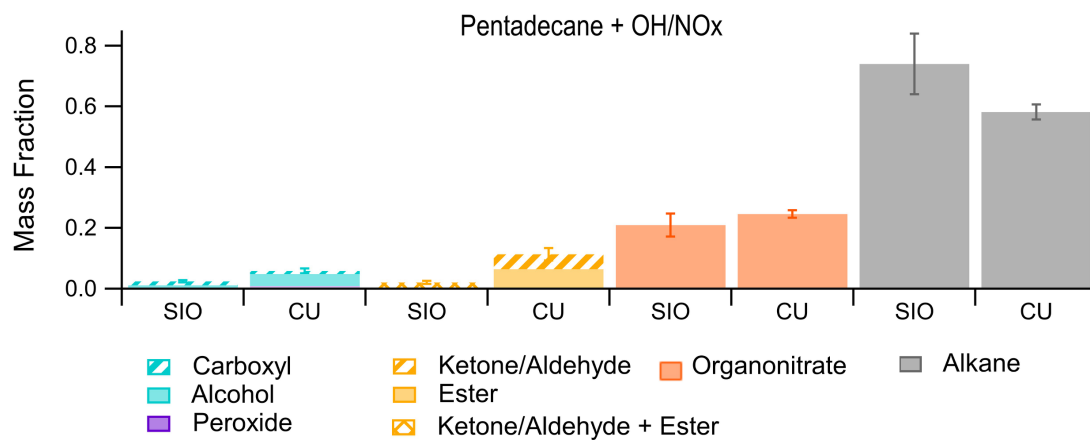

Figure S1. Functional group composition of SOA formed in the environmental chamber reaction of pentadecane with OH radicals in the presence of NO<sub>x</sub>. This corresponds to experiment 5 in Table 1.

Table S1. Functional group composition of the SOA formed from the reaction of selected monoterpenes with NO<sub>3</sub> radicals and analyzed using the Deriv-Spec methods.

|                                  | Limonene                                    | $\alpha$ -Pinene | $\beta$ -Pinene | $\beta$ -Pinene <sup>a</sup> |
|----------------------------------|---------------------------------------------|------------------|-----------------|------------------------------|
| Functional Group                 | Functional Group / C <sub>10</sub> Molecule |                  |                 |                              |
| Carboxyl<br>[O=COH]              | 0.00                                        | 0.00             | 0.06            | 0.04                         |
| Ketone/Aldehyde<br>[C=O]         | 0.17                                        | 0.18             | 0.43            | 0.28                         |
| Ester<br>[O=COR]                 | 0.17                                        | 0.04             | 0.01            | 0.12                         |
| Hydroxyl<br>[HCOH]               | 0.02                                        | 0.05             | 0.00            | 0.08                         |
| Peroxide<br>[HCOOH]              | 0.03                                        | 0.01             | 0.02            | 0.06                         |
| Nitrate<br>[HCONO <sub>2</sub> ] | 1.05                                        | 0.71             | 1.12            | 0.76                         |
| Methylene<br>[CH <sub>2</sub> ]  | 8.56                                        | 9.00             | 8.37            | 8.65                         |
| O/C                              | 0.37                                        | 0.25             | 0.40            | 0.31                         |
| H/C                              | 1.83                                        | 1.88             | 1.80            | 1.84                         |
| N/C                              | 0.10                                        | 0.07             | 0.11            | 0.08                         |
| MW                               | 213                                         | 188              | 217             | 199                          |
| C*<br>( $\mu\text{g m}^{-3}$ )   | $5 \times 10^4$                             | $1 \times 10^5$  | $1 \times 10^4$ | $5 \times 10^4$              |
| Density<br>(g/mL)                | 1.19                                        | 1.07             | 1.21            | 1.12                         |

<sup>a</sup> SOA formed in presence of (NH<sub>4</sub>)<sub>2</sub>SO<sub>4</sub>/H<sub>2</sub>SO<sub>4</sub> seed.

Table S2. Functional group composition of the SOA formed from the reaction of VOCs with OH/NO<sub>x</sub>, OH, or with O<sub>3</sub> and analyzed by the Deriv-Spec methods.

|                                  | Pentadecane                                 | Isoprene        | $\alpha$ -Pinene | $\alpha$ -Pinene | $\alpha$ -Pinene <sup>a</sup> |
|----------------------------------|---------------------------------------------|-----------------|------------------|------------------|-------------------------------|
|                                  | OH/NO <sub>x</sub>                          |                 | OH               |                  | O <sub>3</sub>                |
| Functional Group                 | Functional Group / C <sub>10</sub> Molecule |                 |                  |                  |                               |
| Carboxyl<br>[O=COH]              | 0.07                                        | 0.28            | 0.08             | 0.68             | 1.62                          |
| Ketone/Aldehyde<br>[C=O]         | 0.52                                        | 0.32            | 0.69             | 1.03             | 1.66                          |
| Ester<br>[O=COR]                 | 0.45                                        | 0.61            | 0.65             | 0.26             | 0.71                          |
| Hydroxyl<br>[HCOH]               | 0.40                                        | 0.28            | 0.23             | 0.28             | 0.14                          |
| Peroxide<br>[HCOOH]              | 0.06                                        | 0.04            | 0.08             | 1.03             | 0.13                          |
| Nitrate<br>[HCONO <sub>2</sub> ] | 0.99                                        | 0.33            | 0.55             | 0.00             | 0.00                          |
| Methylene<br>[CH <sub>2</sub> ]  | 12.52                                       | 3.14            | 7.07             | 6.73             | 5.74                          |
| O/C                              | 0.34                                        | 0.69            | 0.42             | 0.52             | 0.67                          |
| H/C                              | 1.80                                        | 1.51            | 1.54             | 1.67             | 1.36                          |
| N/C                              | 0.07                                        | 0.07            | 0.06             | 0.00             | 0.00                          |
| MW                               | 301                                         | 127             | 203              | 221              | 241                           |
| C*<br>( $\mu\text{g m}^{-3}$ )   | 10                                          | $1 \times 10^6$ | $1 \times 10^4$  | $3 \times 10^3$  | 0.1                           |
| Density<br>(g/mL)                | 1.14                                        | 1.45            | 1.27             | 1.26             | 1.45                          |

<sup>a</sup> SOA formed in the absence of seed.

### Micro-Method Hydroxyl Group Analysis

Hydroxyl analysis used the following solutions: 3:2 v/v toluene/methanol; 8 mM trimethylsilyldiazomethane (TMSDM) made from 0.4 M TMSDM in diethyl ether and 3:2 v/v toluene/methanol solution; 0.2 M dinitrobenzoyl chloride (3,5-DNBC) in pyridine; 0.6 M  $\text{NaHCO}_3$  in water; 0.24 N HCl and 0.9 M NaCl in water; 23:2 v/v hexane/dichloromethane (DCM). The procedure was as follows: a sample or standard solution containing at least 0.07 nmol of hydroxyl groups dissolved in 5  $\mu\text{L}$  of toluene/methanol solution is added to a 0.5 mL conical glass reaction vial with 10  $\mu\text{L}$  of TMSDM solution. The solution is kept at room temperature for 1 h to convert any carboxyl groups to methyl esters, and is then dried in a stream of UHP  $\text{N}_2$ . The sample is then reconstituted into 5  $\mu\text{L}$  pyridine and 7.5  $\mu\text{L}$  of 3,5-DNBC solution and left at room temperature for 15 min to allow time for derivatization. To hydrolyze any excess 3,5-DNBC, 25  $\mu\text{L}$  of water is added to the sample and the solution is kept at room temperature for 10 min. The sample is then dried in a stream of UHP  $\text{N}_2$ . Once dried, each sample is reconstituted in 250  $\mu\text{L}$  of hexane/DCM solution. The sample is then washed with 100  $\mu\text{L}$  of  $\text{NaHCO}_3$  solution followed by 250  $\mu\text{L}$  of HCl/NaCl solution, after each washing the aqueous layer is discarded. The remaining organic layer is then dried in a stream of UHP  $\text{N}_2$ , reconstituted into 25  $\mu\text{L}$  of acetonitrile, and the absorbance is measured at 231 nm.
